# Supplementary material for: Monoorganobismuth(iii) dihalides containing the new pincer 2,6-{MeN(CH2CH2)2NCH2}2C6H3ligand: solution NMR, vibrational and single-crystal X-ray studies
Source: Royal Society of Chemistry journal article supplement (doi:10.1039/b811713f), 2008-11-03
Supplement: b811713f.pdf [file b811713f.pdf]

## Supporting information

### **Monoorganobismuth(III) dihalides containing the new pincer 2,6-{MeN(CH<sub>2</sub>CH<sub>2</sub>)<sub>2</sub>NCH<sub>2</sub>}<sub>2</sub>C<sub>6</sub>H<sub>3</sub> ligand: solution NMR, vibrational and single-crystal X-ray studies**

**Albert Soran,<sup>a</sup> Hans J. Breunig,<sup>\*b</sup> Vito Lippolis,<sup>\*c</sup> Massimiliano Arca<sup>c</sup> and Cristian Silvestru,<sup>\*a</sup>**

<sup>a</sup> Facultatea de Chimie si Inginerie Chimica, Universitatea Babes-Bolyai, RO-400028, Cluj-Napoca, Romania. E-mail: cristi@chem.ubbcluj.ro; Fax: +40 264 590818; Tel: +40 264 593833

<sup>b</sup> Institut für Anorganische und Physikalische Chemie, Universität Bremen, D-28334, Bremen, Germany. E-mail: breunig@chemie.uni-bremen.de; Fax: +49 421 218 4042; Tel: +49 421 218 2266

<sup>c</sup> Dipartimento di Chimica Inorganica ed Analitica, Università degli Studi di Cagliari, S.S. 554 Bivio per Sestu, 09042-Monserrato (CA), Italy. E-mail: lippolis@unica.it; Fax: +39 070 6754456, Tel: +39 070 6754467

[2,6-{MeN(CH<sub>2</sub>CH<sub>2</sub>)<sub>2</sub>N}CH<sub>2</sub>]<sub>2</sub>C<sub>6</sub>H<sub>3</sub>]BiCl<sub>2</sub> (**2**)

- the crystal contains a 1:1 mixture of (*S*<sub>N1</sub>,*S*<sub>N3</sub>) and (*R*<sub>N1</sub>,*R*<sub>N3</sub>) isomers
  - intramolecular distances
- |              |        |                             |
|--------------|--------|-----------------------------|
| Cl(1)⋯H(7A)  | 2.96 Å | $\sum r_{vdw}(Cl,H)$ 3.01 Å |
| Cl(1)⋯H(12B) | 2.85 Å |                             |
| Cl(1)⋯H(16B) | 2.87 Å |                             |
| Cl(2)⋯H(8A)  | 2.85 Å |                             |
| Cl(2)⋯H(10B) | 2.86 Å |                             |
| Cl(2)⋯H(14B) | 2.95 Å |                             |

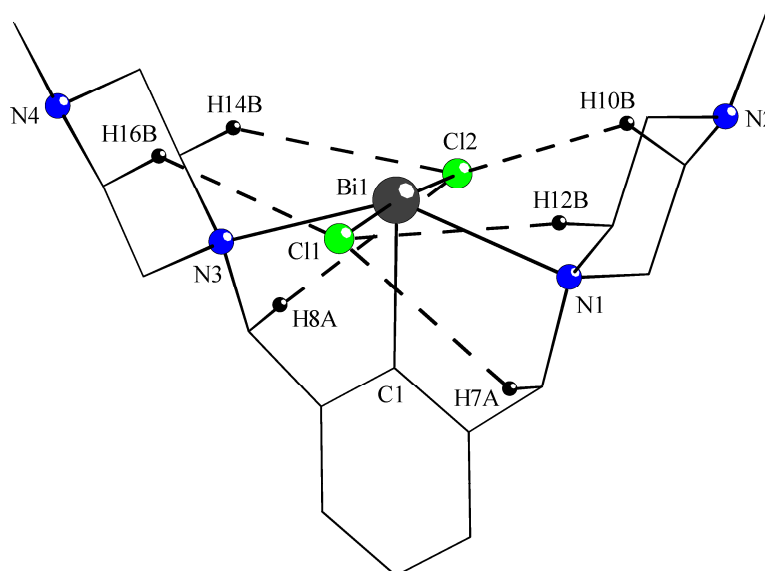

**Figure S1.** Intramolecular chlorine-hydrogen contacts in the molecule of (*R*<sub>N1</sub>,*R*<sub>N3</sub>)-**2** isomer (only hydrogens involved in intramolecular interactions are shown).

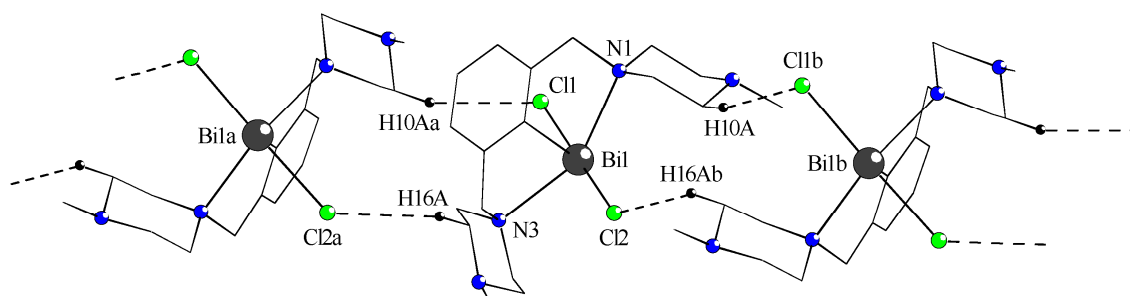

**Figure S2.** View of the chain polymer of alternating (*S*<sub>N1</sub>,*S*<sub>N3</sub>) and (*R*<sub>N1</sub>,*R*<sub>N3</sub>) isomers in the crystal of **2** (only hydrogens involved in intermolecular interactions are shown). Symmetry equivalent positions: Bi(1a) (*0.5+x*, *1.5-y*, *0.5+z*); Bi(1b) (*-0.5+x*, *1.5-y*, *-0.5+z*). Intermolecular contacts within a chain: Cl(1)⋯H(10Aa)<sub>N-methylene-ring</sub> 2.85 Å; Cl(2)⋯H(16Ab)<sub>N-methylene-ring</sub> 2.87 Å. No further inter-chain contacts.

[2,6-{MeN(CH<sub>2</sub>CH<sub>2</sub>)<sub>2</sub>N}CH<sub>2</sub>]<sub>2</sub>C<sub>6</sub>H<sub>3</sub>]BiBr<sub>2</sub> (**3**)

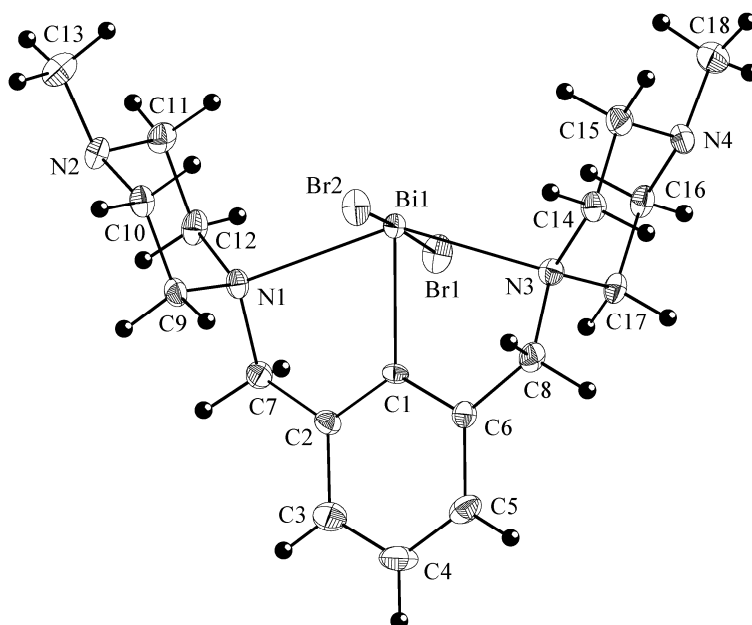

**Figure S3.** Molecular structure of the (*R*<sub>N1</sub>,*R*<sub>N3</sub>) isomer of **3** (ORTEP drawing with 20% probability ellipsoids) with the labeling scheme for the atom positions.

- the crystal contains a 1:1 mixture of (*S*<sub>N1</sub>,*S*<sub>N3</sub>) and (*R*<sub>N1</sub>,*R*<sub>N3</sub>) isomers
- intramolecular distances  
Br(1)⋯H(7A) 2.92 Å  
Br(1)⋯H(12B) 3.00 Å  
Br(1)⋯H(17A) 3.10 Å  
Br(1)⋯H(16B) 2.94 Å  
Br(2)⋯H(10B) 2.93 Å  
Br(2)⋯H(8A) 3.03 Å  
Br(2)⋯H(14B) 2.90 Å  
 $\sum r_{\text{vdW}}(\text{Br},\text{H})$  3.15 Å

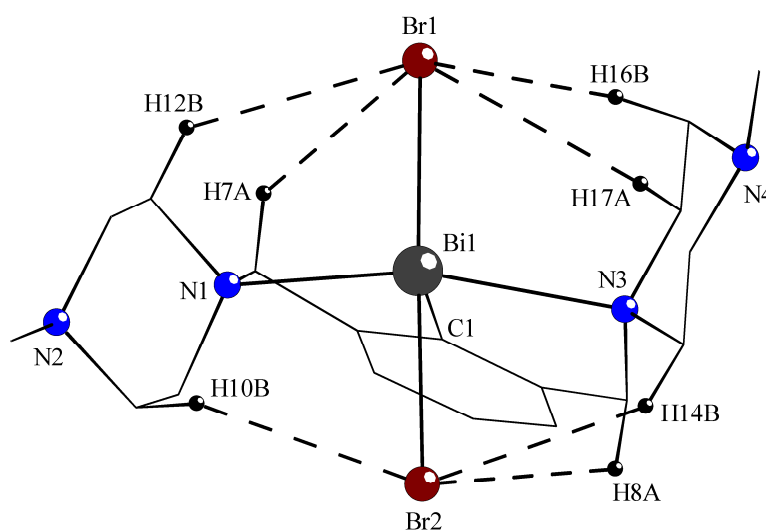

**Figure S4.** Intramolecular bromine-hydrogen contacts in the molecule of (*R*<sub>N1</sub>,*R*<sub>N3</sub>)-**3** isomer (only hydrogens involved in intramolecular interactions are shown).

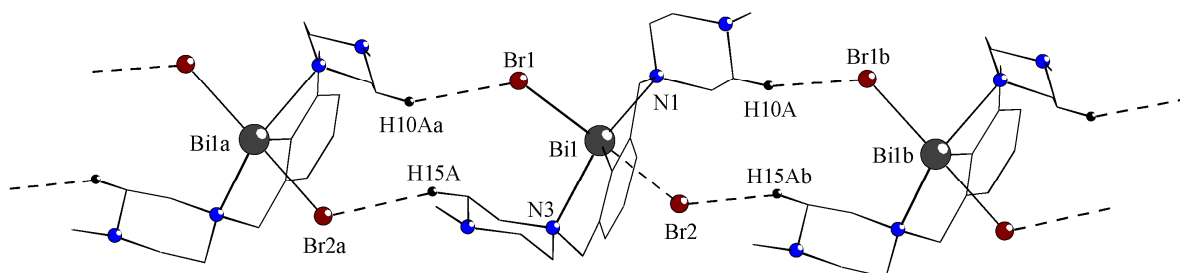

**Figure S5.** View of the chain polymer of alternating ( $S_{N1}, S_{N3}$ ) and ( $R_{N1}, R_{N3}$ ) isomers in the crystal of **3** (only hydrogens involved in intermolecular interactions are shown). Symmetry equivalent positions: Bi(1a) ( $-0.5+x, 0.5-y, -0.5+z$ ); Bi(1b) ( $0.5+x, 0.5-y, 0.5+z$ ). Intermolecular contacts within a chain: Br(1) $\cdots$ H(10Aa)<sub>N-methylene-ring</sub> 2.94 Å; Br(2) $\cdots$ H(16Ab)<sub>N-methylene-ring</sub> 2.96 Å.

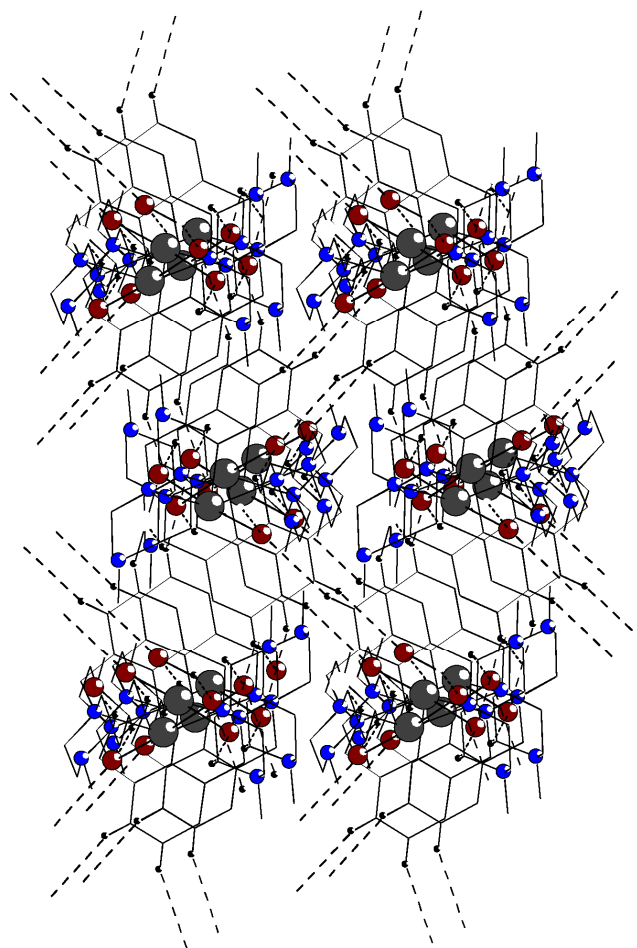

**Figure S6.** View of the tridimensional network built from columnar chain polymers in the crystal of **3**, through weak bromine-hydrogen inter-chain contacts (only hydrogens involved in hydrogen contacts are shown). Symmetry equivalent positions: Bi(1c) ( $1.5-x, -0.5+y, 0.5-z$ ); Bi(1d) ( $0.5-x, -0.5+y, 0.5-z$ ); Bi(1e) ( $0.5-x, 0.5+y, 0.5-z$ ); Bi(1f) ( $1.5-x, 0.5+y, 0.5-z$ ). Inter-chain contacts: Br(1) $\cdots$ H(4e)<sub>aryl</sub> 3.11 Å; Br(2) $\cdots$ H(5f)<sub>aryl</sub> 3.14 Å.

[2,6-{MeN(CH<sub>2</sub>CH<sub>2</sub>)<sub>2</sub>N}CH<sub>2</sub>]<sub>2</sub>C<sub>6</sub>H<sub>3</sub>]BiI<sub>2</sub> (4)

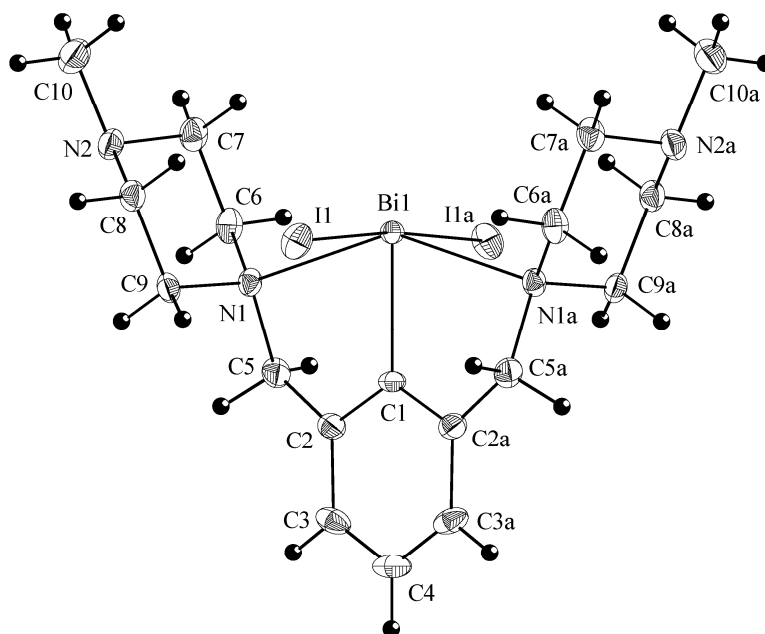

**Figure S7.** Molecular structure of the (*R*<sub>N1</sub>,*R*<sub>N1a</sub>) isomer of **4** (ORTEP drawing with 20% probability ellipsoids) with the labeling scheme for the atom positions.

- the crystal contains a 1:1 mixture of (*S*<sub>N1</sub>,*S*<sub>N1a</sub>) and (*R*<sub>N1</sub>,*R*<sub>N1a</sub>) isomers
- intramolecular distances  
I(1)⋯H(5Aa) 3.21 Å  
I(1)⋯H(6Ba) 3.04 Å  
I(1)⋯H(8B) 3.18 Å  
I(1)⋯H(9A) 3.16 Å  
 $\sum r_{\text{vdW}}(\text{I},\text{H})$  3.35 Å

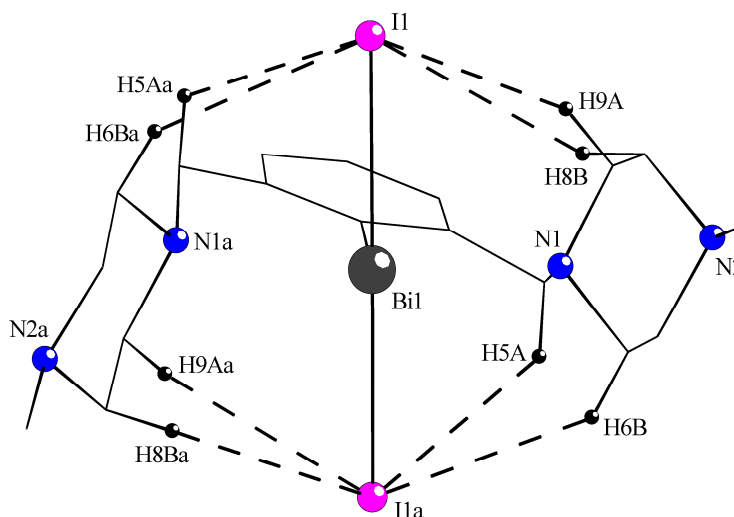

**Figure S8.** Intramolecular iodine-hydrogen contacts in the molecule of (*R*<sub>N1</sub>,*R*<sub>N3</sub>)-**4** isomer (only hydrogens involved in intramolecular interactions are shown). No further intermolecular contacts.

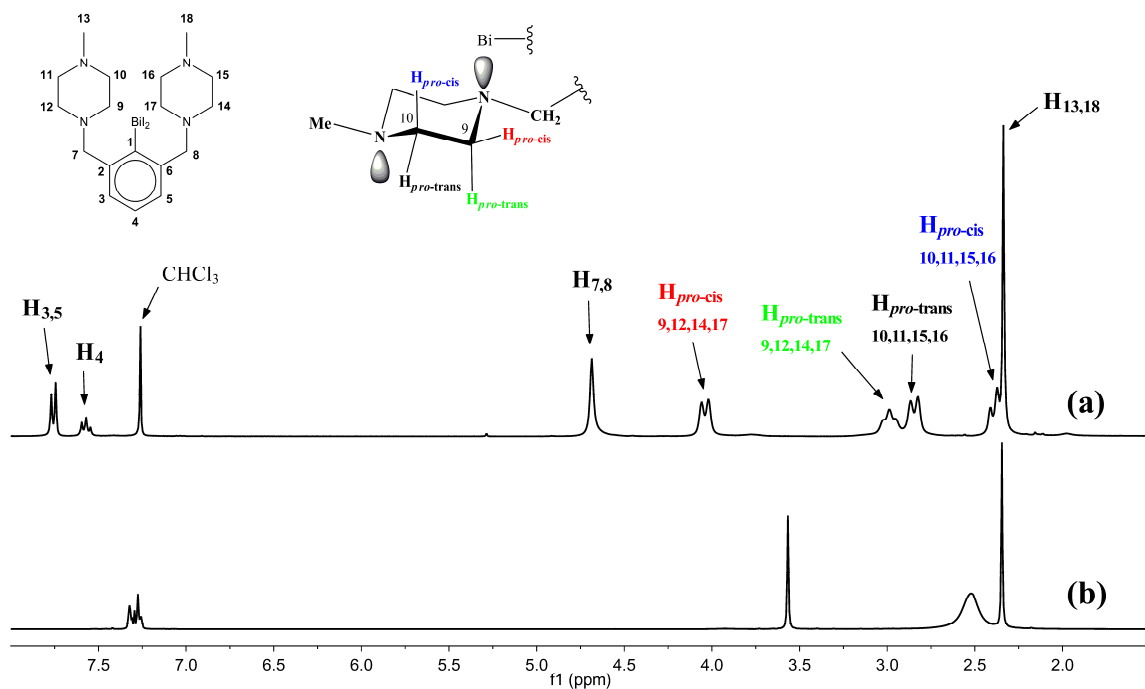

**Figure S9.**  $^1\text{H}$  NMR ( $\text{CDCl}_3$ , 400 MHz) spectra of (a) diiodide **4**, and (b) the free organic ligand **1**.

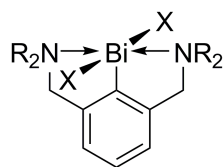

R = H X = Cl (**5a**); Br (**6a**); I (**7a**)  
 R = Me X = Cl (**5**); Br (**6**); I (**7**)

**Table S1.** Selected optimized<sup>a,b</sup> and experimental<sup>c</sup> bond lengths (Å) and angles (°) for the dihalides **5a–7a** and **5–7**.

| Compound  | R  | X  | Bi-X               | Bi-C  | Bi-N  | X-Bi-X | N-Bi-N | $\tau^d$ |
|-----------|----|----|--------------------|-------|-------|--------|--------|----------|
| <b>5a</b> | H  | Cl | <sup>a</sup> 2.683 | 2.214 | 2.510 | 175.69 | 144.18 | 80.03    |
|           |    |    | <sup>b</sup> 2.657 | 2.206 | 2.490 | 173.81 | 143.86 | 79.40    |
| <b>6a</b> | H  | Br | <sup>a</sup> 2.860 | 2.215 | 2.512 | 177.97 | 144.23 | 80.24    |
|           |    |    | <sup>b</sup> 2.828 | 2.207 | 2.490 | 175.79 | 143.99 | 79.53    |
| <b>7a</b> | H  | I  | <sup>a</sup> 3.079 | 2.215 | 2.512 | 179.91 | 144.53 | 80.78    |
|           |    |    | <sup>b</sup> 3.039 | 2.208 | 2.493 | 177.57 | 144.12 | 80.00    |
| <b>5</b>  | Me | Cl | <sup>a</sup> 2.692 | 2.204 | 2.590 | 179.94 | 144.84 | 70.80    |
|           |    |    | <sup>b</sup> 2.667 | 2.196 | 2.556 | 178.09 | 144.67 | 70.01    |
|           |    |    | <sup>c</sup> 2.704 | 2.224 | 2.566 | 173.73 | 144.18 | 70.89    |
| <b>6</b>  | Me | Br | <sup>a</sup> 2.875 | 2.206 | 2.601 | 176.81 | 144.64 | 71.09    |
|           |    |    | <sup>b</sup> 2.843 | 2.198 | 2.567 | 178.92 | 144.47 | 70.39    |
|           |    |    | <sup>c</sup> 2.840 | 2.194 | 2.565 | 175.86 | 144.34 | 71.33    |
| <b>7</b>  | Me | I  | <sup>a</sup> 3.105 | 2.209 | 2.616 | 187.66 | 144.12 | 71.08    |
|           |    |    | <sup>b</sup> 3.064 | 2.201 | 2.583 | 185.22 | 143.99 | 70.26    |
|           |    |    | <sup>c</sup> 3.082 | 2.215 | 2.589 | 180.30 | 143.65 | 70.42    |

<sup>a</sup> Calculated with the B3LYP functional; <sup>b</sup> calculated with the mPW1PWfunctional; <sup>c</sup> structural experimental mean values; <sup>d</sup> dihedral angle between the CBiX<sub>2</sub> plane and that containing the phenyl ring.

**Table S2.** Selected NBO charges Q (e) and Wiberg bond indexes calculated for dihalides **5a–7a** and **5–7**.

| Compound  | R  | X  |              | Q(Bi) | Q(X)   | Q(N)   | W(Bi-C) | W(Bi-X) | W(Bi-N) |
|-----------|----|----|--------------|-------|--------|--------|---------|---------|---------|
| <b>5a</b> | H  | Cl | <sup>a</sup> | 1.499 | -0.663 | -0.895 | 0.709   | 0.476   | 0.264   |
|           |    |    | <sup>b</sup> | 1.502 | -0.662 | -0.907 | 0.704   | 0.477   | 0.262   |
| <b>6a</b> | H  | Br | <sup>a</sup> | 1.376 | -0.608 | -0.892 | 0.718   | 0.518   | 0.268   |
|           |    |    | <sup>b</sup> | 1.378 | -0.605 | -0.904 | 0.713   | 0.521   | 0.267   |
| <b>7a</b> | H  | I  | <sup>a</sup> | 1.251 | -0.55  | -0.891 | 0.728   | 0.548   | 0.273   |
|           |    |    | <sup>b</sup> | 1.249 | -0.546 | -0.902 | 0.722   | 0.553   | 0.271   |
| <b>5</b>  | Me | Cl | <sup>a</sup> | 1.522 | -0.657 | -0.582 | 0.699   | 0.477   | 0.238   |
|           |    |    | <sup>b</sup> | 1.532 | -0.655 | -0.593 | 0.691   | 0.478   | 0.233   |
| <b>6</b>  | Me | Br | <sup>a</sup> | 1.398 | -0.601 | -0.578 | 0.707   | 0.522   | 0.243   |
|           |    |    | <sup>b</sup> | 1.405 | -0.597 | -0.588 | 0.700   | 0.525   | 0.238   |
| <b>7</b>  | Me | I  | <sup>a</sup> | 1.270 | -0.542 | -0.573 | 0.715   | 0.554   | 0.246   |
|           |    |    | <sup>b</sup> | 1.275 | -0.535 | -0.585 | 0.709   | 0.559   | 0.242   |

<sup>a</sup> Calculated with the B3LYP functional; <sup>b</sup> calculated with the mPW1PWfunctional.

**Table S3.** Experimental FT-Raman and FT-IR spectra in the low frequency region (500 –50 cm<sup>-1</sup>) of **5-7**.

| Compound | FT-Raman                                                                              | FT-IR                                                                                              |
|----------|---------------------------------------------------------------------------------------|----------------------------------------------------------------------------------------------------|
| <b>5</b> | 473 (1.6), 449 (1.8), 371 (3), 230 (1.3), 215 (1.3), 202 (1), 164 (1.8), 109 (10)     | 480m, 454br s, 372m, 358m, 279m, 270m, 227m, 196br m, 173br s, 140br m, 105br s                    |
| <b>6</b> | 473 (1.4), 451 (1.4), 370 (5), 334 (2), 205 (3), 161 (4), 134 (7.6), 122 (2), 92 (10) | 480w, 456m, 438s, 420m, 386s, 352m, 326m, 303m, 280s, 267m, 227m, 203m, 140br m, 128 br m, 120br m |
| <b>7</b> | 473 (1.1), 450 (1.3), 368 (2.2), 205 (1.3), 162 (2.9), 119 (1.5), 103 (10), 85 (4.5)  | 404br s, 392 m, 352m, 325s, 302s, 290m, 280s, 227w, 144w, 101br m                                  |
